# Supplementary material for: On the cross-tropopause transport of water by tropical convective overshoots: a mesoscale modelling study constrained by in-situ observations during TRO-Pico field campaign in Brazil
Source: Copernicus journal article supplement (doi:10.5194/acp-2021-543), 2021-07-19
Supplement: Supplementary file 1 [file acp-2021-543-supplement.zip]

Archive with 3 entries (3 files):
- movie_brams_cross-section_13March2012.mp4
- movie_radar_brams_13March2012.mp4
- Behera_Overshoots_15July2021_SI.pdf
