# Supplementary material for: On the cross-tropopause transport of water by tropical convective overshoots: a mesoscale modelling study constrained by in-situ observations during TRO-Pico field campaign in Brazil
Source: Copernicus journal article supplement (doi:10.5194/acp-2021-543), 2021-07-19
Supplement: Supplementary file 1 [file acp-2021-543-supplement.zip › Behera_Overshoots_15July2021_SI.pdf]

## **Supplement of**

# **“On the cross-tropopause transport of water by tropical convective overshoots: a mesoscale modelling study constrained by in situ observations during TRO-Pico field campaign in Brazil”**

Abhinna K. Behera et al.

**Correspondence:** Abhinna K. Behera (abhinna.behera@univ-lille.fr)

- movie\_radar\_brams\_13March2012.mp4
- movie\_brams\_cross-section\_13March2012.mp4

**S1. Total water content at 17.2 km altitude in NU21**

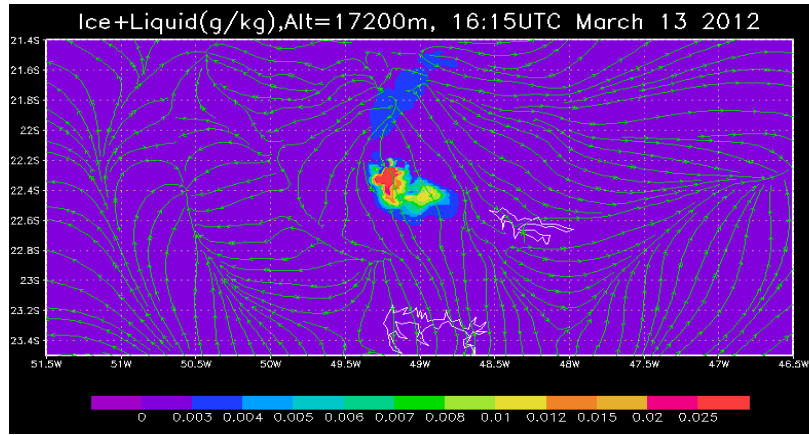

(a)

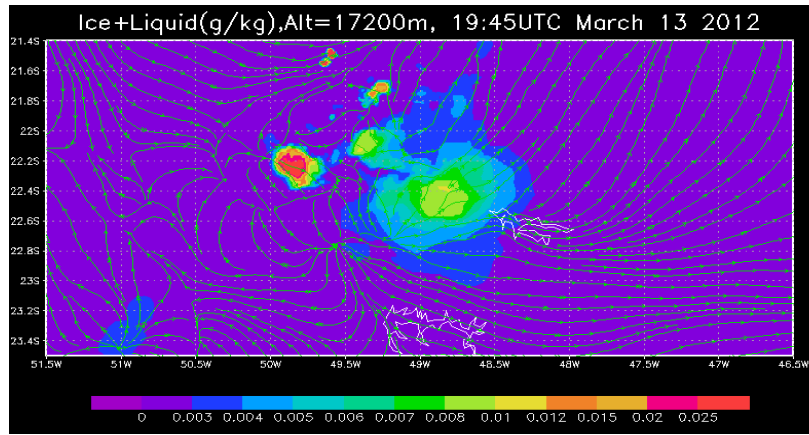

(b)

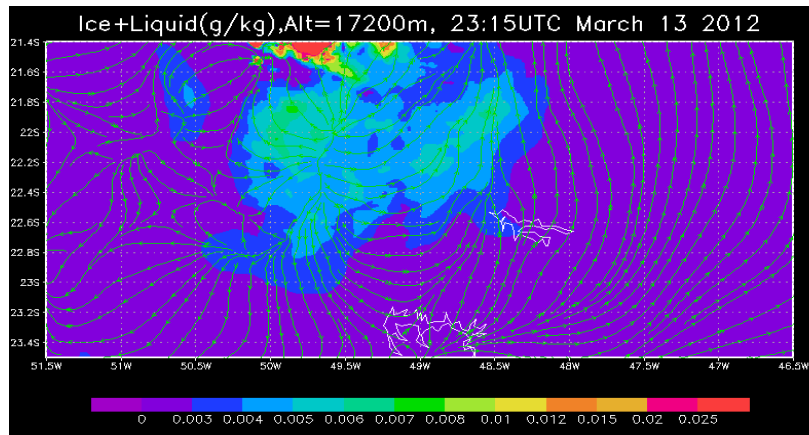

(c)

**Figure S1.** BRAMS simulation: NU21 total water content ( $\text{g kg}^{-1}$ ), at 17.2 km altitude at a) 16:15 UT, b) 19:45 UT, and c) 23:15 UT, respectively. The streamlines represent the horizontal wind fields within the domain, a composite of the second and the third grid.
