# Supplementary material for: On the cross-tropopause transport of water by tropical convective overshoots: a mesoscale modelling study constrained by in-situ observations during TRO-Pico field campaign in Brazil
Source: Copernicus journal article supplement (doi:10.5194/acp-2021-543), 2021-07-19

Case 1

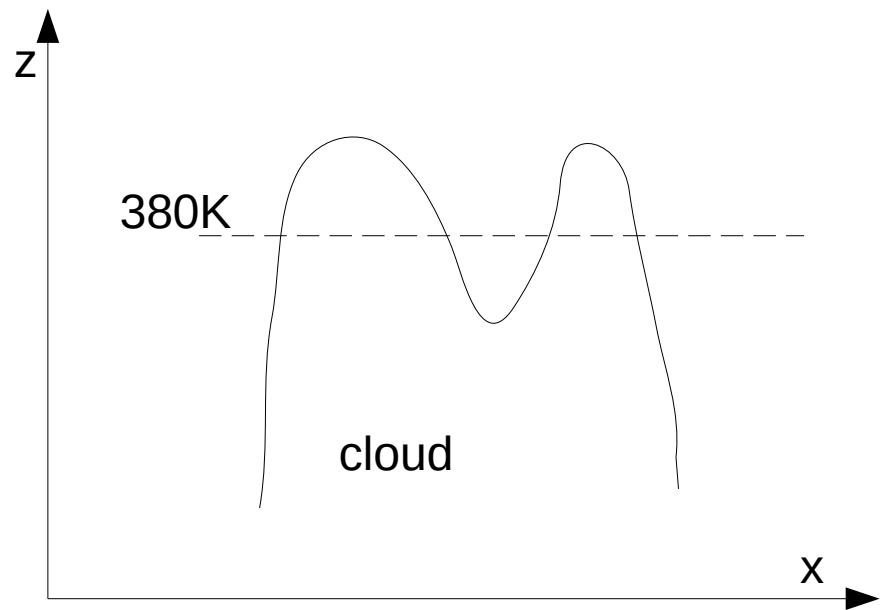

Case 2

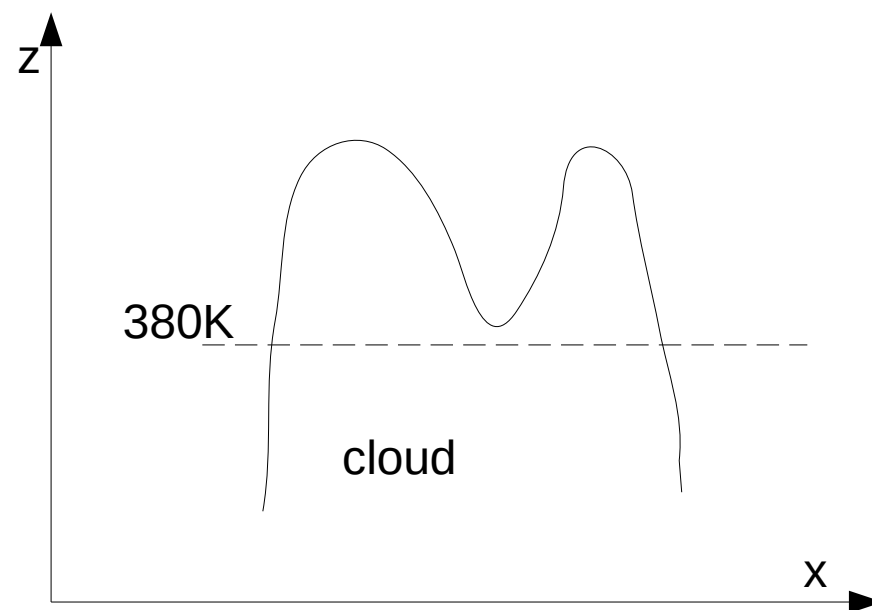

Case 3

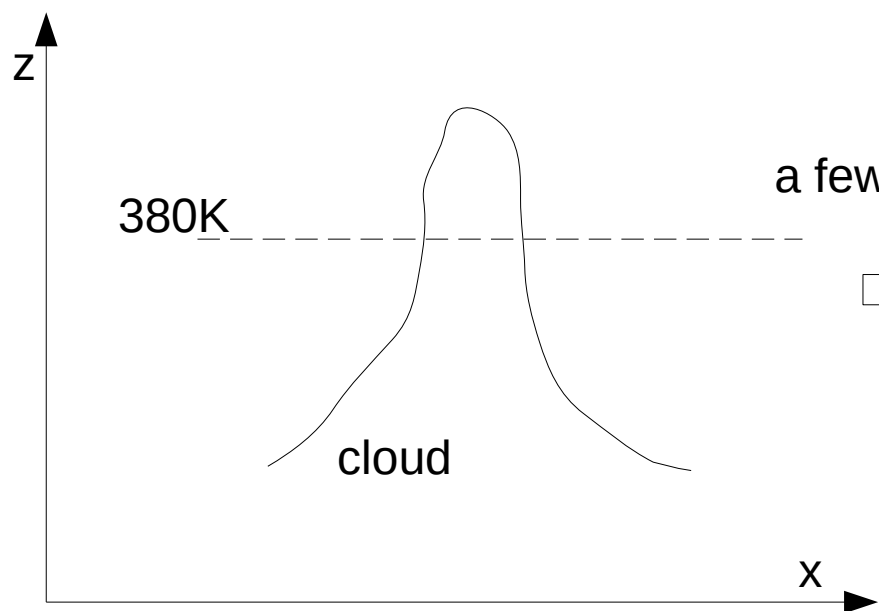

a few minutes later

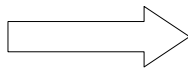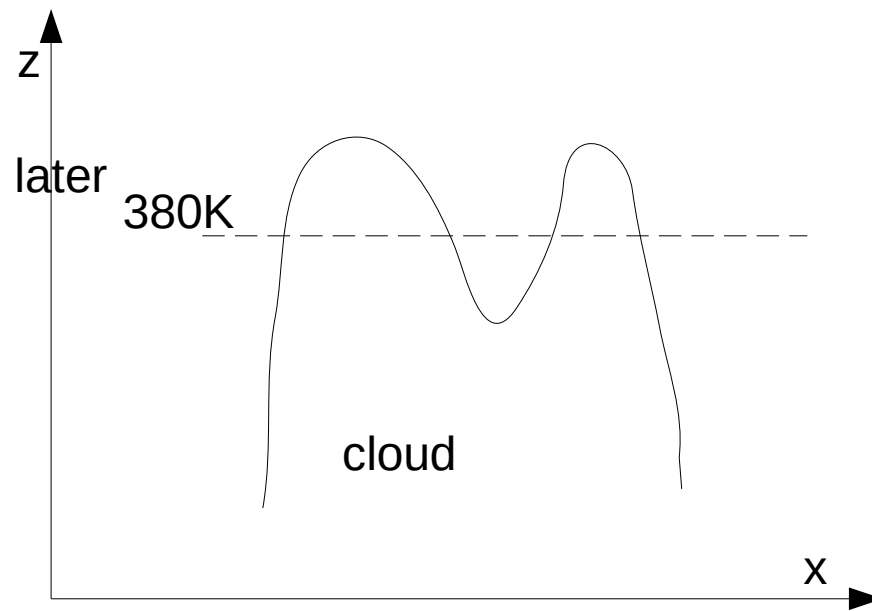

Supplement: Supplementary file [file acp-2021-543-RC1-supplement.pdf]
